# Supplementary material for: Two copper-based MOFs constructed from a linear diisophthalate linker: supramolecular isomerism and gas adsorption properties
Source: Royal Society of Chemistry journal article supplement (doi:10.1039/c9ce00359b), 2019-01-01
Supplement: c9ce00359b1.pdf [file c9ce00359b1.pdf]

**Two copper-based MOFs constructed from a linear diisophthalate  
linker: supramolecular isomerism and gas adsorption properties**

Minghui He, Tingting Xu, Zhenzhen Jiang, Xinjian Yu, Ying Zou, Luyao Yang,  
Xiaojuan Wang, Xia Wang and Yabing He\*

Key Laboratory of the Ministry of Education for Advanced Catalysis Materials,  
College of Chemistry and Life Sciences, Zhejiang Normal University, Jinhua 321004,  
China. E-mail: [heyabing@zjnu.cn](mailto:heyabing@zjnu.cn)

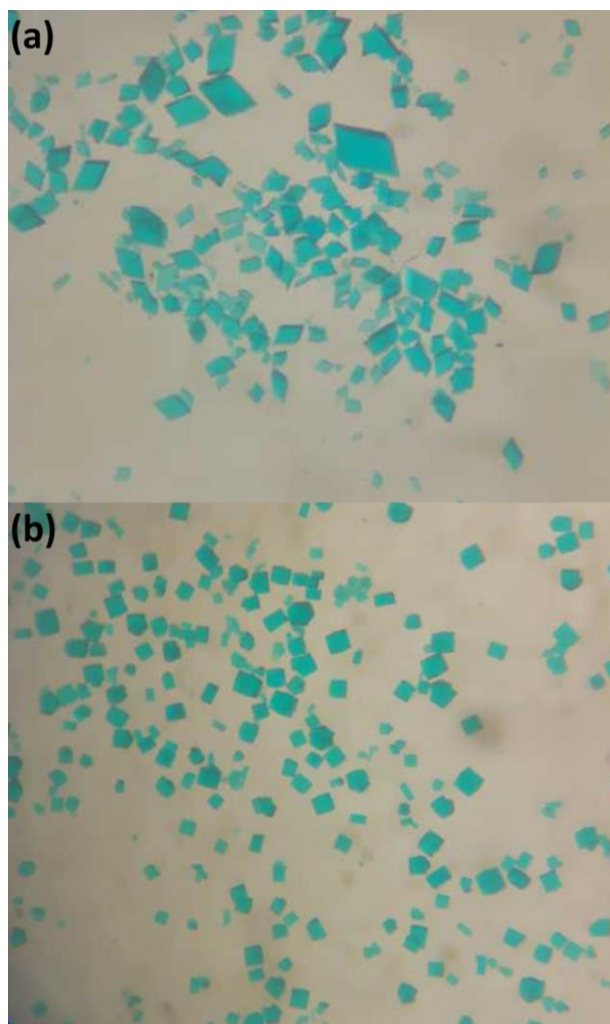

**Fig. S1** Electronic photographs of the as-synthesized (a) **ZJNU-96** and (b) **ZJNU-97**.

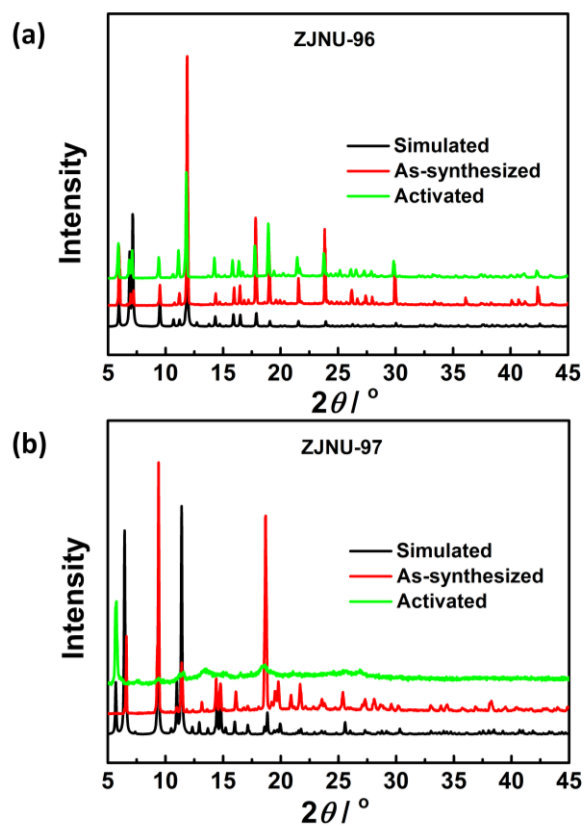

**Fig. S2** Experimental and simulated PXRD patterns for (a) **ZJNU-96** and (b) **ZJNU-97**.

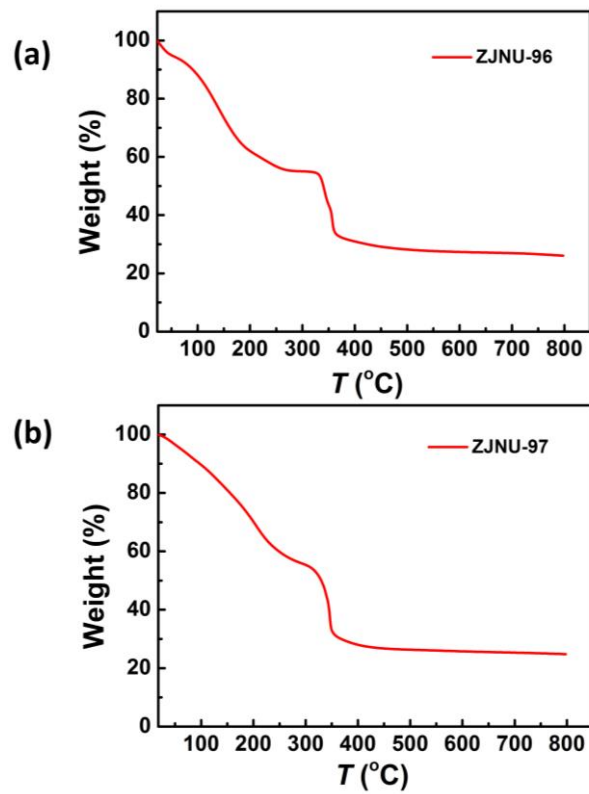

**Fig. S3** TGA curves of the as-synthesized (a) **ZJNU-96** and (b) **ZJNU-97** under  $\text{N}_2$  atmosphere.

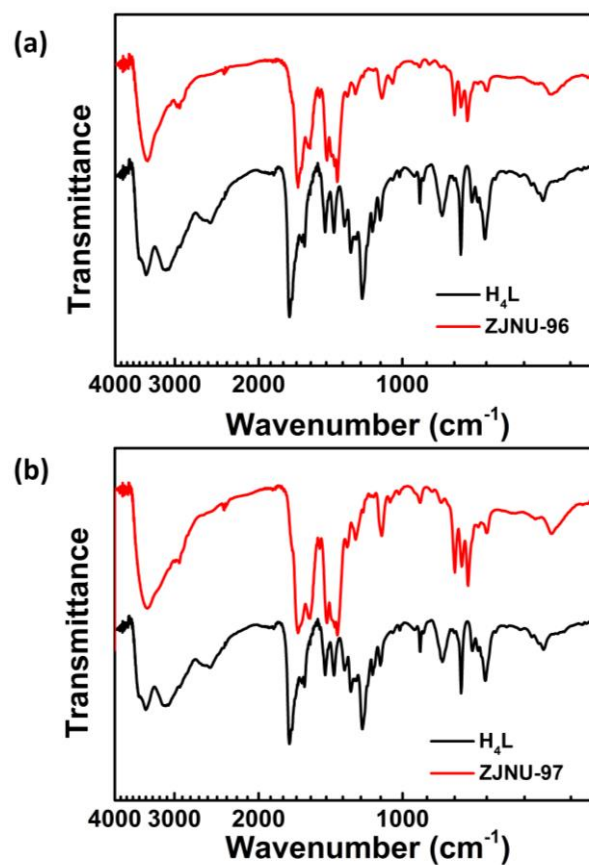

**Fig. S4** Comparison of FTIR spectra of the as-synthesized MOFs and their corresponding ligands.

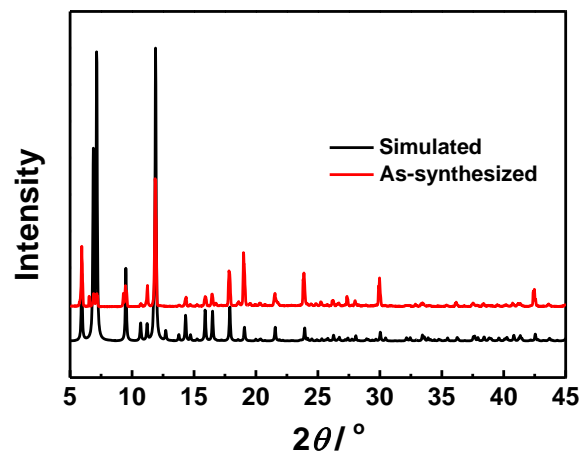

**Fig. S5.** The simulated PXRD pattern (black) of **ZJNU-96**, and the experimental PXRD pattern (red) of the as-synthesized solids obtained under the same solvothermal conditions as **ZJNU-97** except that HCl is replaced by HBF<sub>4</sub>. The results indicate that the acid additive has an important effect on the final product.

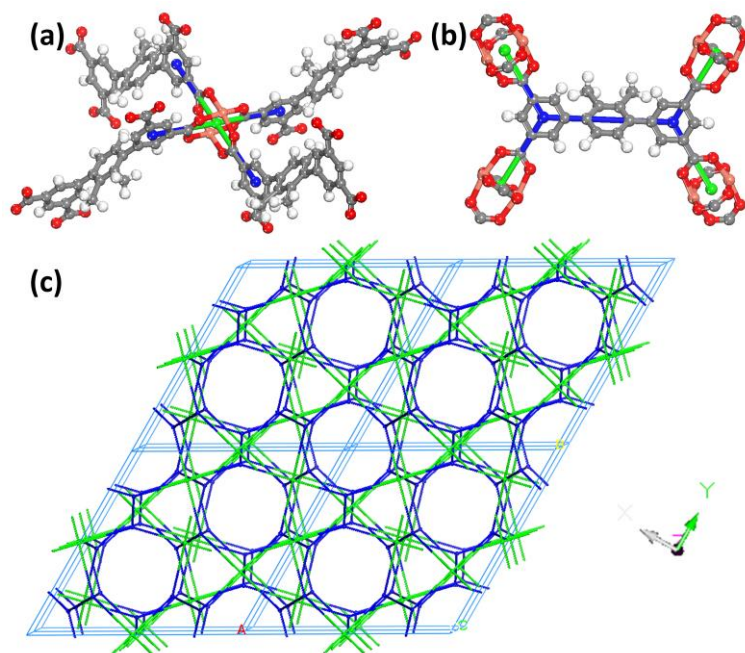

**Fig. S6** Topological analyses of **ZJNU-96**. (a) The dicopper paddlewheel SBU is simplified as a 4-connected node; (b) the ligand is viewed as a pair of 3-connected nodes; (c) the simplified topological network.

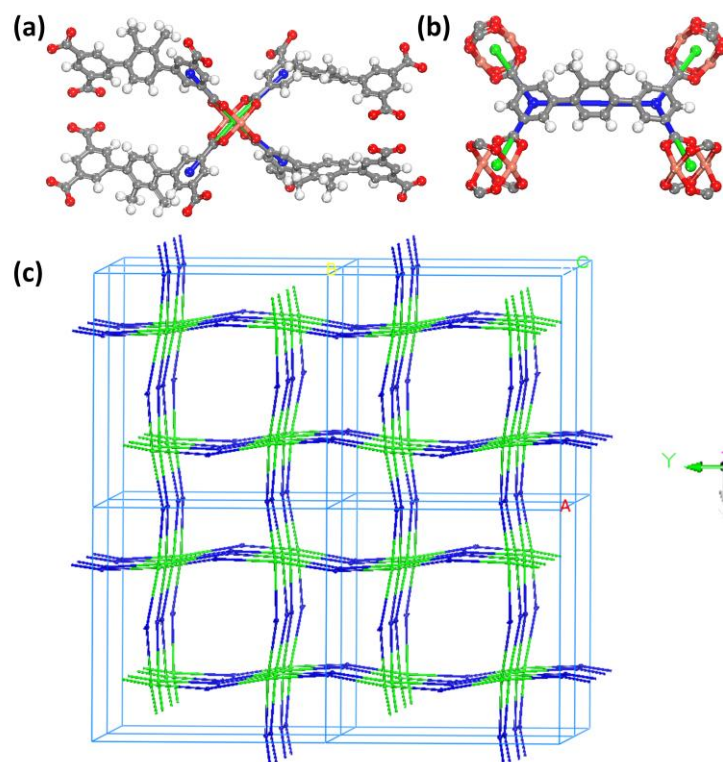

**Fig. S7** Topological analyses of **ZJNU-97**. (a) The dicopper paddlewheel SBU is simplified as a 4-connected node; (b) the ligand is viewed as a pair of 3-connected nodes; (c) the simplified topological network.



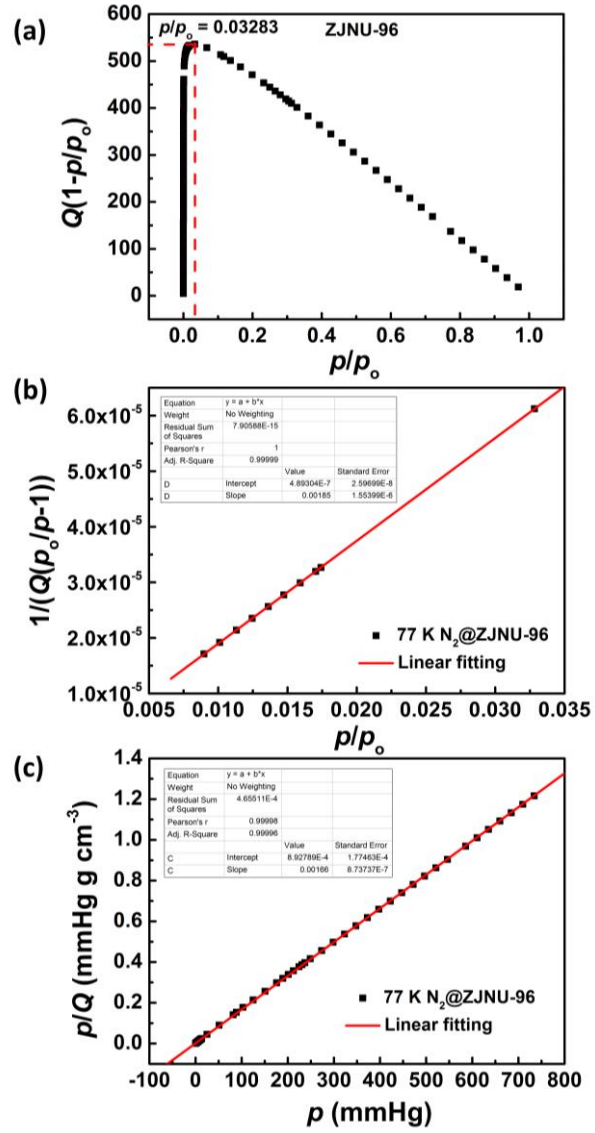

$$S_{\text{BET}} = 1/(4.89304 \times 10^{-7} + 0.00185)/22414 \times 6.023 \times 10^{23} \times 0.162 \times 10^{-18} = 2352 \text{ m}^2 \text{ g}^{-1}$$

$$S_{\text{Langmuir}} = (1/0.00166)/22414 \times 6.023 \times 10^{23} \times 0.162 \times 10^{-18} = 2622 \text{ m}^2 \text{ g}^{-1}$$

$$\text{BET constant } C = 1 + 0.00185/4.89304 \times 10^{-7} = 3782$$

$$(p/p_o)_{n_m} = \frac{1}{\sqrt{C} + 1} = 0.01600$$

**Fig. S8** The consistency plot (a), BET surface area plot (b), and Langmuir surface area plot (c) for ZJNU-96.

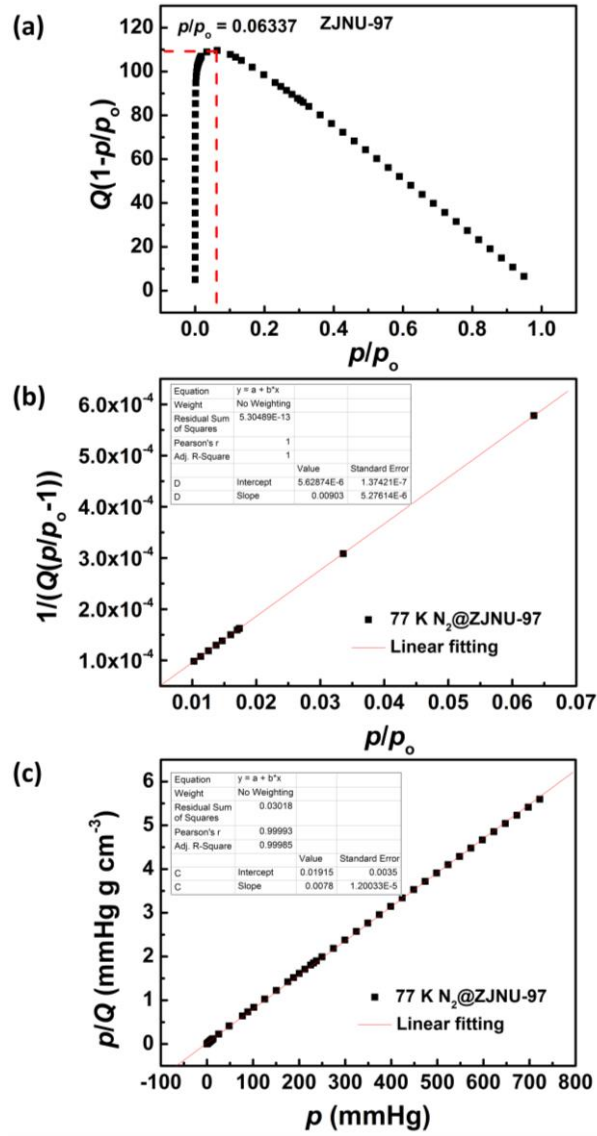

$$S_{\text{BET}} = 1/(5.62874 \times 10^{-6} + 0.00903)/22414 \times 6.023 \times 10^{23} \times 0.162 \times 10^{-18} = 482 \text{ m}^2 \text{ g}^{-1}$$

$$S_{\text{Langmuir}} = (1/0.0078)/22414 \times 6.023 \times 10^{23} \times 0.162 \times 10^{-18} = 558 \text{ m}^2 \text{ g}^{-1}$$

$$\text{BET constant } C = 1 + 0.00903/5.62874 \times 10^{-6} = 1605$$

$$(p/p_o)_{n_m} = \frac{1}{\sqrt{C} + 1} = 0.02435$$

**Fig. S9** The consistency plot (a), BET surface area plot (b), and Langmuir surface area plot (c) for ZJNU-97.

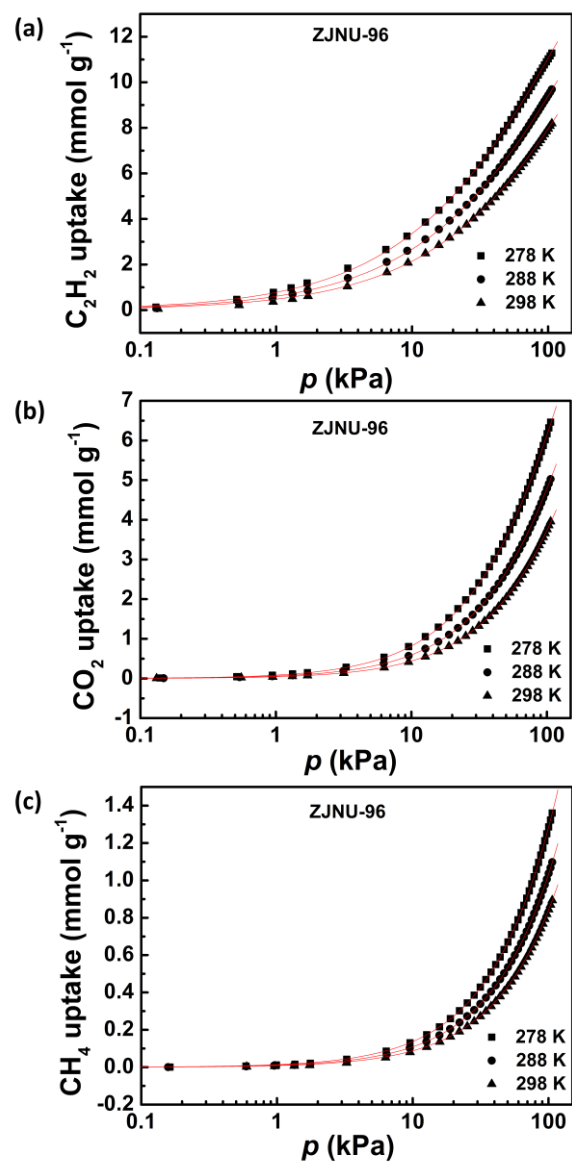

**Fig. S10** Comparison of the pure-component isotherm data for (a)  $\text{C}_2\text{H}_2$ , (b)  $\text{CO}_2$ , and (c)  $\text{CH}_4$  in **ZJNU-96** with the fitted isotherms at 278 K, 288 K, and 298 K.

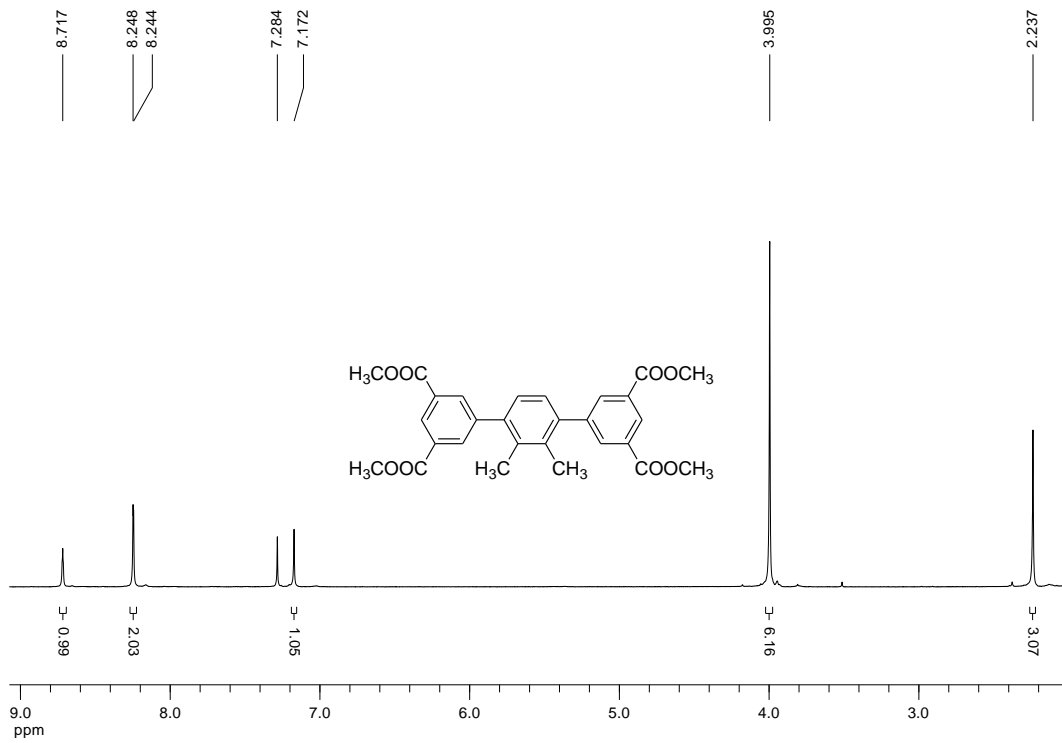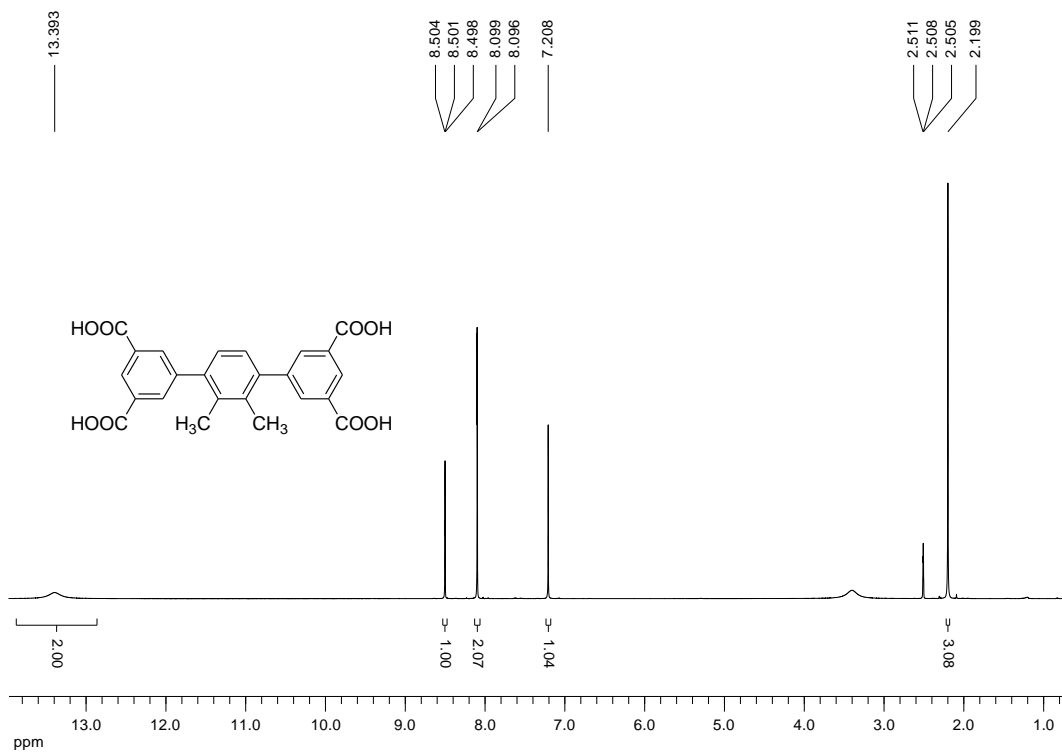

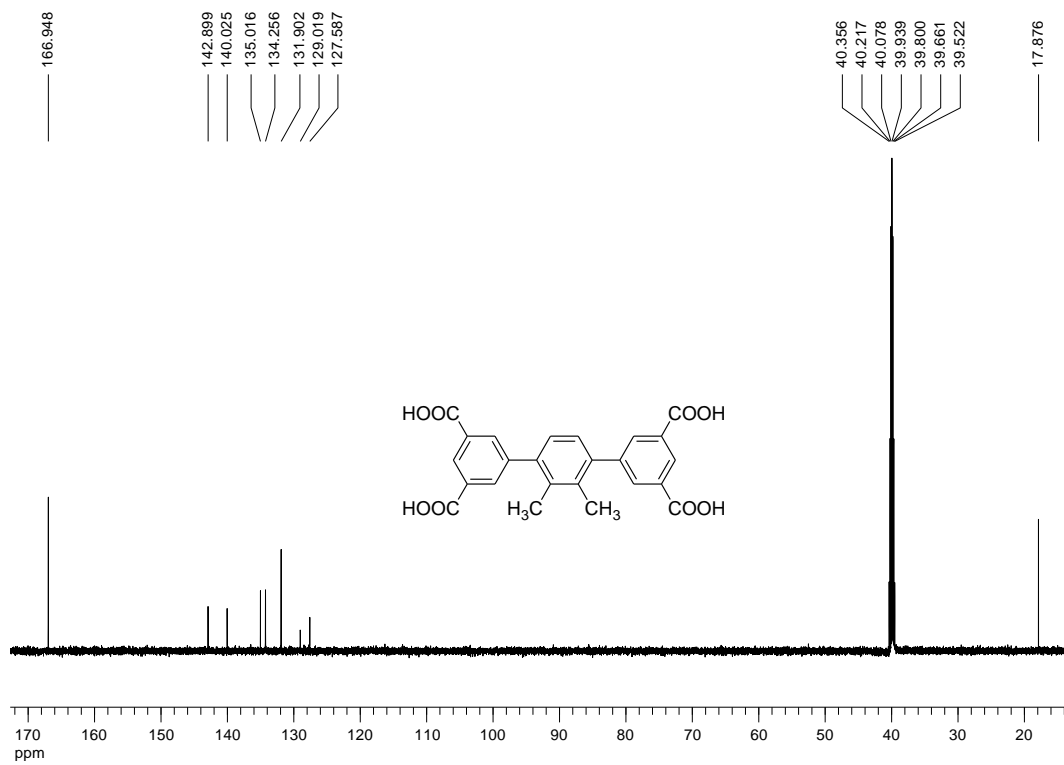

**Fig. S11**  $^1\text{H}$  and  $^{13}\text{C}$  NMR spectra.

**Table S1** Crystal data and structure refinement for **ZJNU-96** and **ZJNU-97**.

| MOFs                                                          | ZJNU-96                                                                                                                              | ZJNU-97                                                                                                                             |
|---------------------------------------------------------------|--------------------------------------------------------------------------------------------------------------------------------------|-------------------------------------------------------------------------------------------------------------------------------------|
| Empirical formula                                             | C <sub>24</sub> H <sub>18</sub> Cu <sub>2</sub> O <sub>10</sub>                                                                      | C <sub>24</sub> H <sub>18</sub> Cu <sub>2</sub> O <sub>10</sub>                                                                     |
| Formula weight                                                | 593.46                                                                                                                               | 593.46                                                                                                                              |
| $\lambda$ (Å)                                                 | 0.71073                                                                                                                              | 0.71073                                                                                                                             |
| Crystal system                                                | Trigonal                                                                                                                             | Tetragonal                                                                                                                          |
| Space group                                                   | <i>R</i> - $\bar{3}m$                                                                                                                | <i>P</i> 4 <sub>2</sub> /mnm                                                                                                        |
| Unit cell dimensions                                          | $a = 18.5984(9)$ Å<br>$b = 18.5984(9)$ Å<br>$c = 38.5338(18)$ Å<br>$\alpha = 90^\circ$<br>$\beta = 90^\circ$<br>$\gamma = 120^\circ$ | $a = 18.8260(8)$ Å<br>$b = 18.8260(8)$ Å<br>$c = 27.3427(12)$ Å<br>$\alpha = 90^\circ$<br>$\beta = 90^\circ$<br>$\gamma = 90^\circ$ |
| $V$ (Å <sup>3</sup> )                                         | 11543.1(12)                                                                                                                          | 9690.8(9)                                                                                                                           |
| $Z$                                                           | 9                                                                                                                                    | 8                                                                                                                                   |
| $D_c$ (g cm <sup>-3</sup> )                                   | 0.768                                                                                                                                | 0.814                                                                                                                               |
| $\mu$ (mm <sup>-1</sup> )                                     | 0.855                                                                                                                                | 0.906                                                                                                                               |
| $F(000)$                                                      | 2700                                                                                                                                 | 2400                                                                                                                                |
| Crystal size (mm)                                             | 0.150 × 0.120 × 0.100                                                                                                                | 0.160 × 0.120 × 0.110                                                                                                               |
| $\theta$ range for data collection (°)                        | 2.190 to 26.408                                                                                                                      | 2.135 to 26.427                                                                                                                     |
| Limiting indices                                              | $-23 \leq h \leq 23$<br>$-23 \leq k \leq 19$<br>$-48 \leq l \leq 48$                                                                 | $-23 \leq h \leq 23$<br>$-23 \leq k \leq 23$<br>$-34 \leq l \leq 34$                                                                |
| Reflections collected / unique                                | 34508 / 2890                                                                                                                         | 119462 / 5310                                                                                                                       |
| $R_{\text{int}}$                                              | 0.0480                                                                                                                               | 0.0715                                                                                                                              |
| Max. and min. transmission                                    | 0.918 and 0.884                                                                                                                      | 0.905 and 0.878                                                                                                                     |
| Refinement method                                             | Full-matrix least-squares on $F^2$                                                                                                   | Full-matrix least-squares on $F^2$                                                                                                  |
| Data/restraints/parameters                                    | 2890 / 0 / 112                                                                                                                       | 5310 / 1 / 151                                                                                                                      |
| Goodness-of-fit on $F^2$                                      | 1.034                                                                                                                                | 1.075                                                                                                                               |
| Final $R$ indices [ $I > 2\sigma(I)$ ]                        | $R_1 = 0.051$<br>$wR_2 = 0.1733$                                                                                                     | $R_1 = 0.0726$<br>$wR_2 = 0.3080$                                                                                                   |
| $R$ indices (all data)                                        | $R_1 = 0.0634$<br>$wR_2 = 0.1868$                                                                                                    | $R_1 = 0.0843$<br>$wR_2 = 0.3394$                                                                                                   |
| Largest diff. peak and hole (e <sup>-</sup> Å <sup>-3</sup> ) | 1.375 and -0.525                                                                                                                     | 1.799 and -0.972                                                                                                                    |
| CCDC                                                          | 1878724                                                                                                                              | 1902428                                                                                                                             |

**Table S2** Langmuir-Freundlich parameters for adsorption of C<sub>2</sub>H<sub>2</sub>, CO<sub>2</sub>, and CH<sub>4</sub> in ZJNU-96.

| Guest                         | $q_{\text{sat}}$<br>(mmol g <sup>-1</sup> ) | $b_0$<br>(kPa) <sup>-<math>\nu</math></sup> | $E$<br>(kJ mol <sup>-1</sup> ) | $\nu$  | $R^2$   |
|-------------------------------|---------------------------------------------|---------------------------------------------|--------------------------------|--------|---------|
| C <sub>2</sub> H <sub>2</sub> | 28.05037                                    | 1.75667 × 10 <sup>-5</sup>                  | 17.084                         | 0.6791 | 0.99985 |
| CO <sub>2</sub>               | 22.02122                                    | 2.86031 × 10 <sup>-7</sup>                  | 21.980                         | 1      | 0.99995 |
| CH <sub>4</sub>               | 17.1598                                     | 9.99996 × 10 <sup>-7</sup>                  | 15.471                         | 1      | 0.99998 |
